# Supplementary material for: Can Twitter Be a Source of Information on Allergy? Correlation of Pollen Counts with Tweets Reporting Symptoms of Allergic Rhinoconjunctivitis and Names of Antihistamine Drugs
Source: PubMed Central journal article supplement (PMC4510127; doi:10.1371/journal.pone.0133706), 2015-07-21

# Pollen count trend for all climate areas

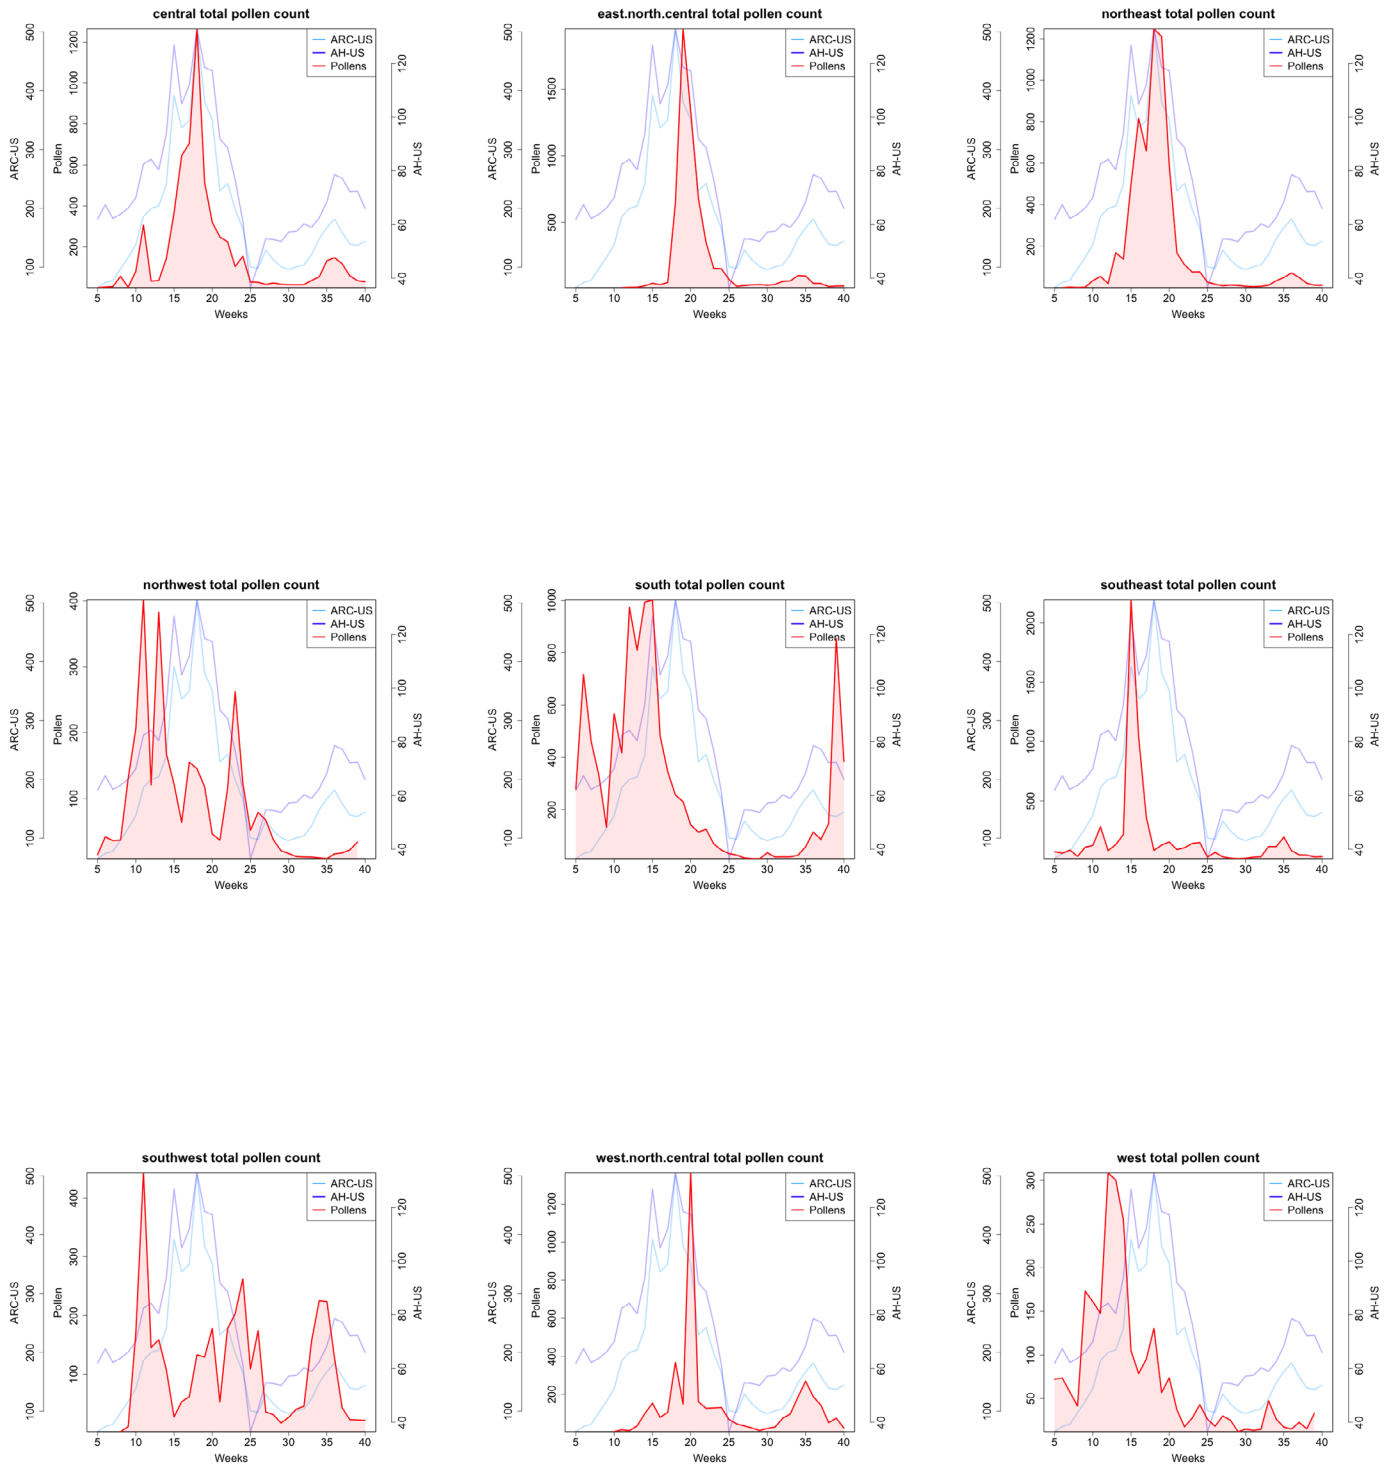

# Pollen count trend for all states

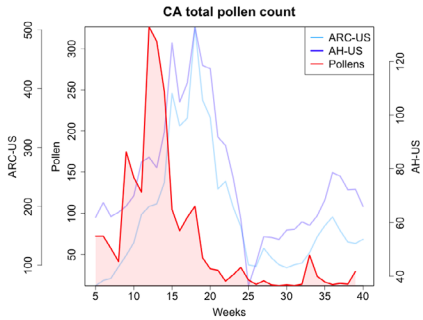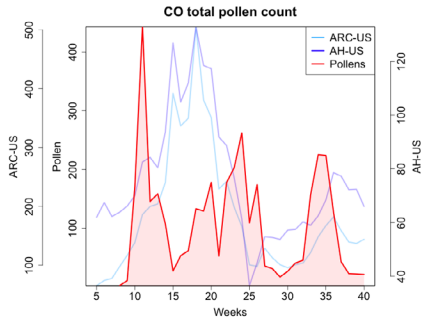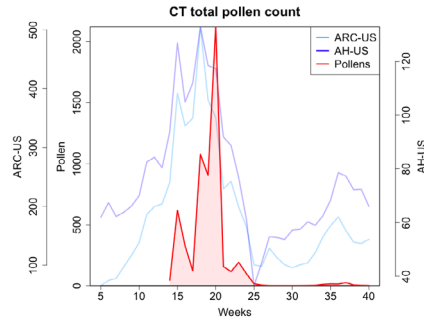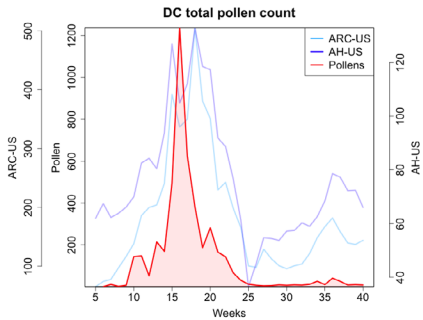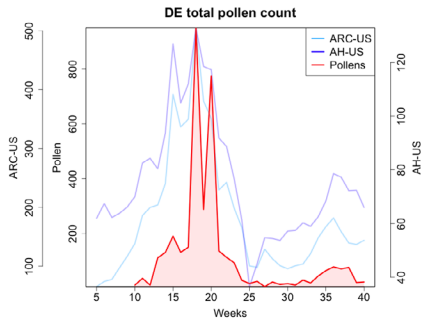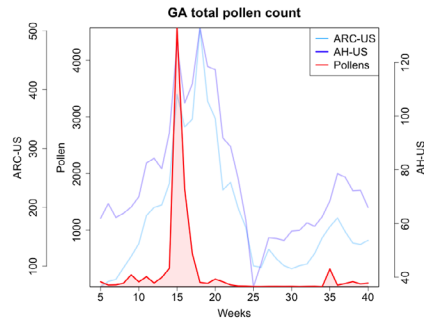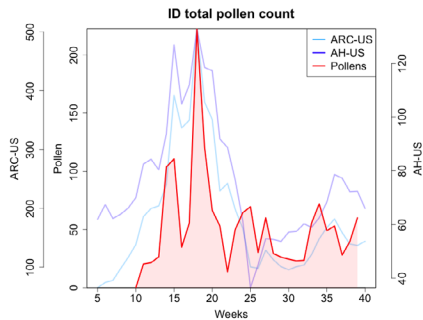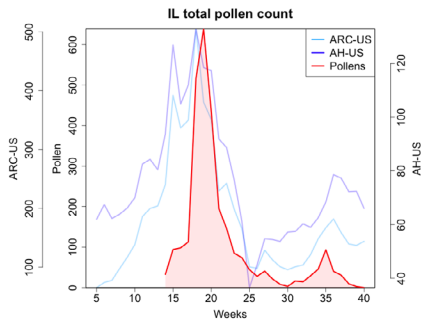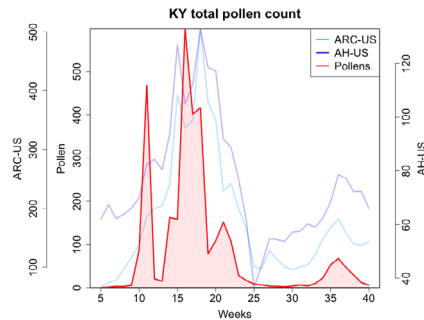

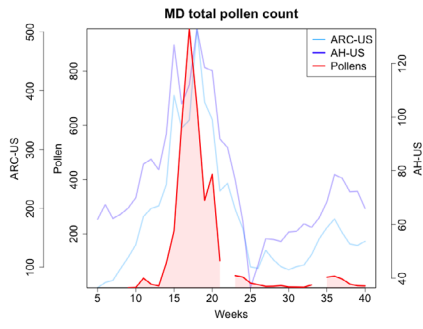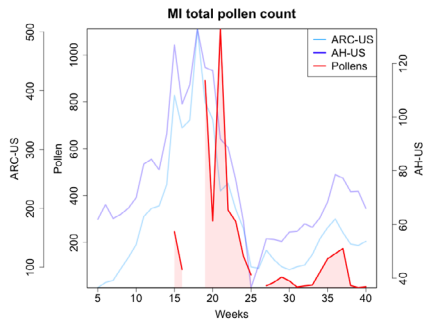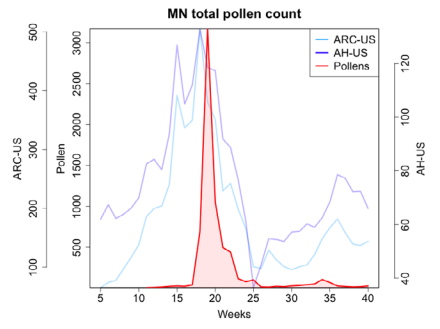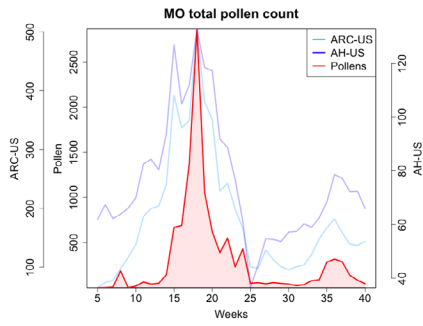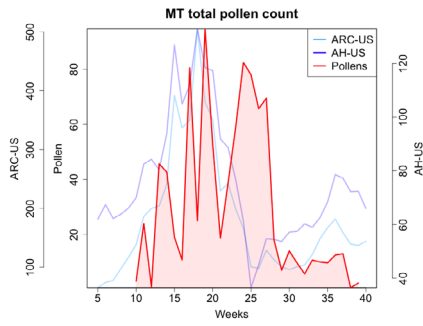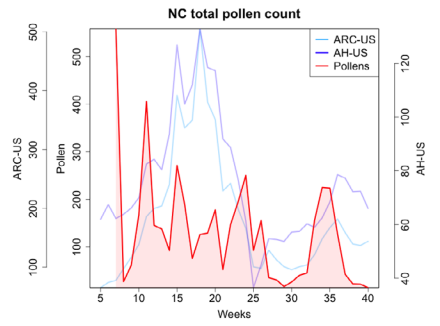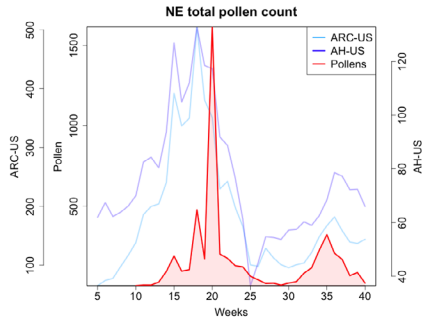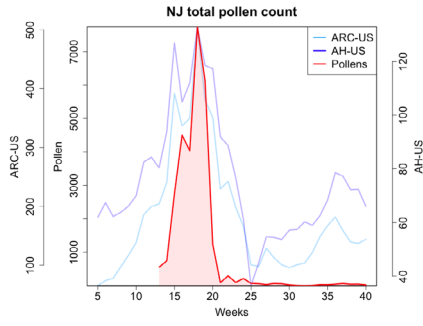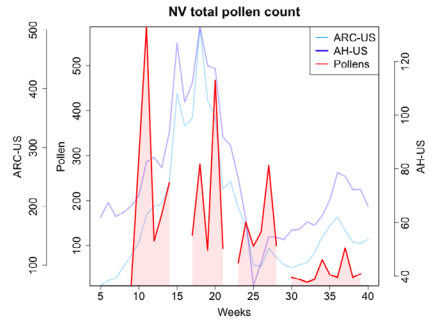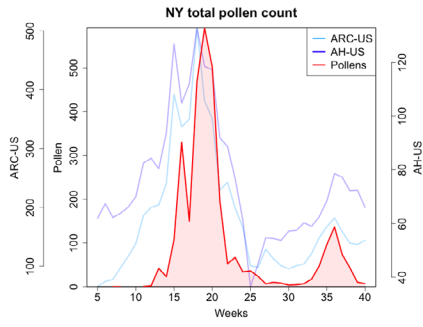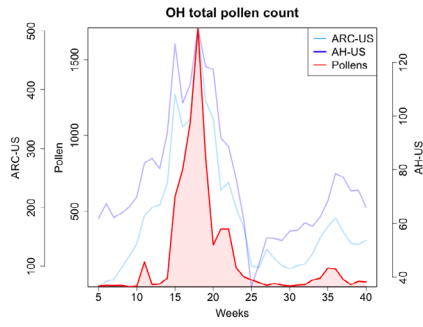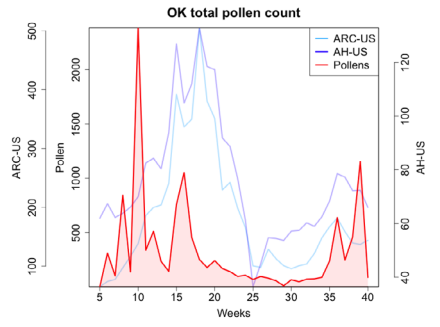

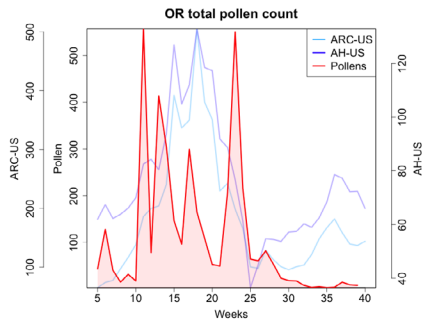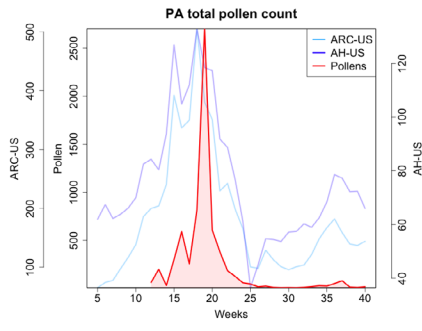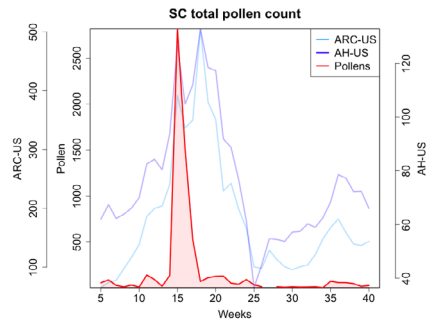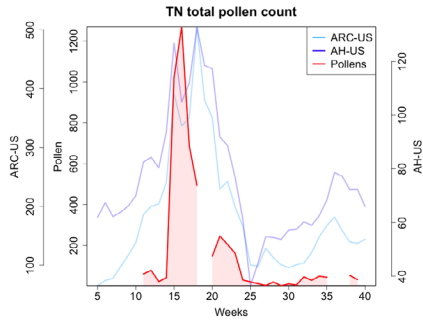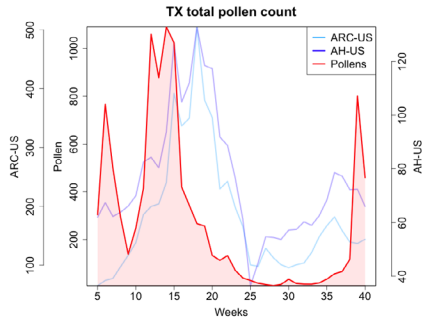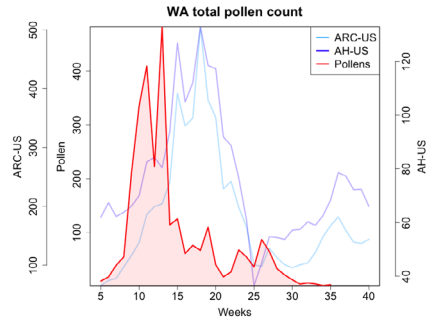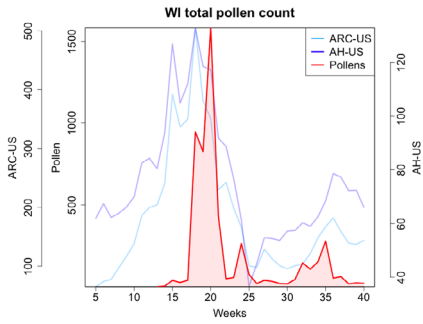

# Pollen count trend for all cities

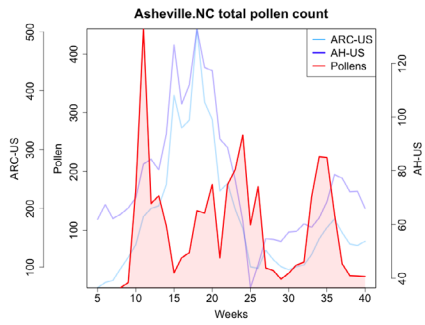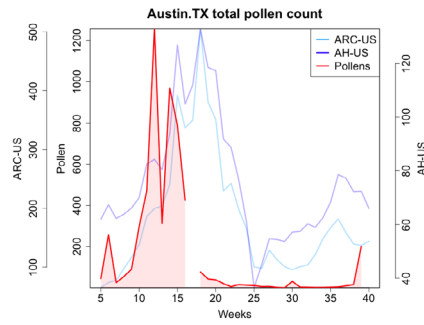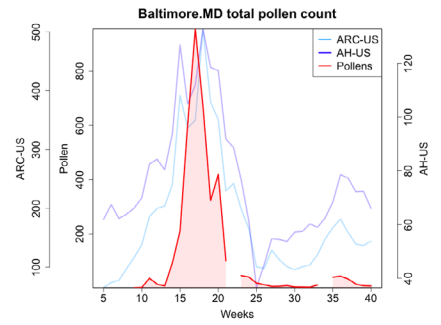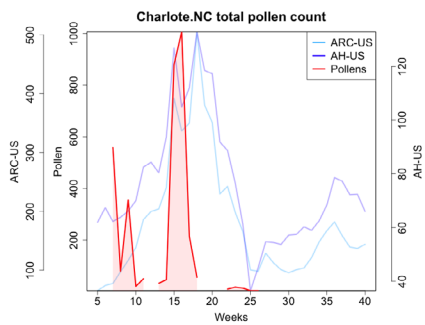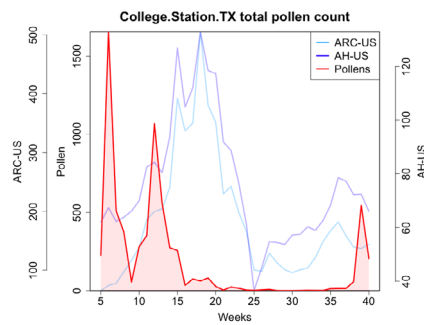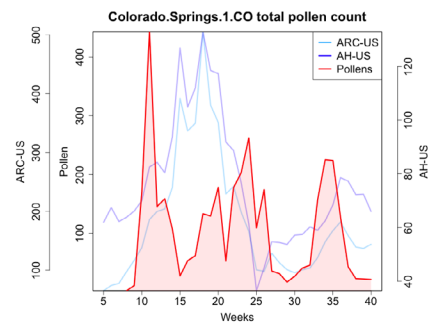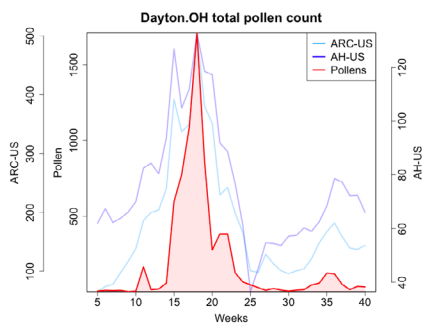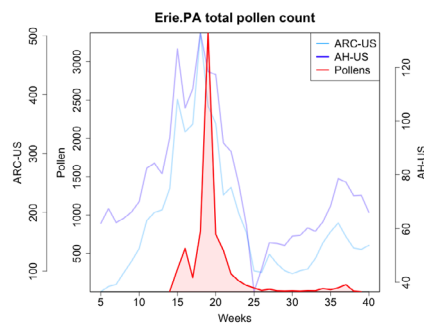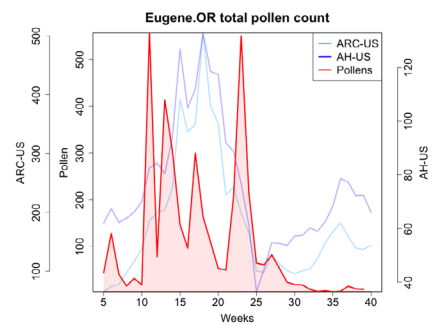

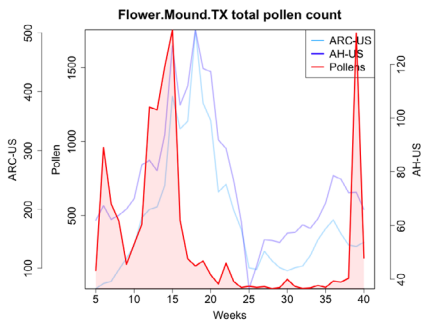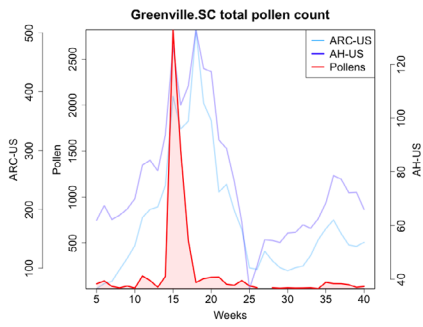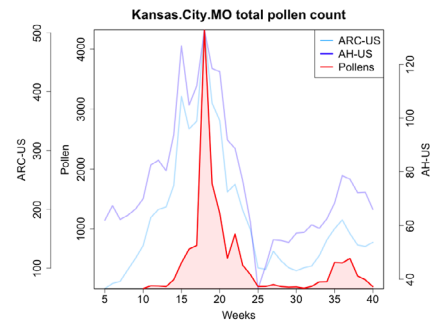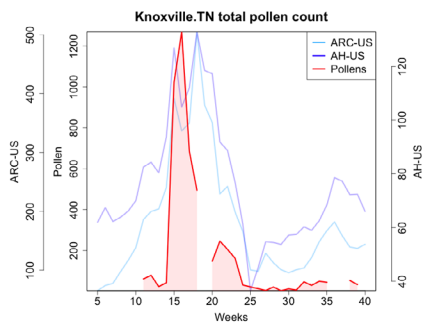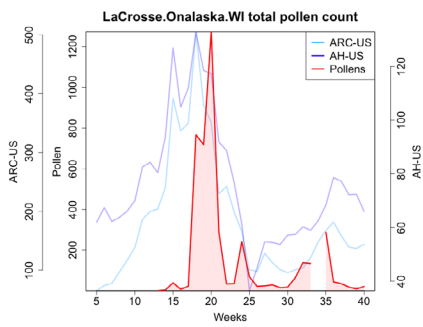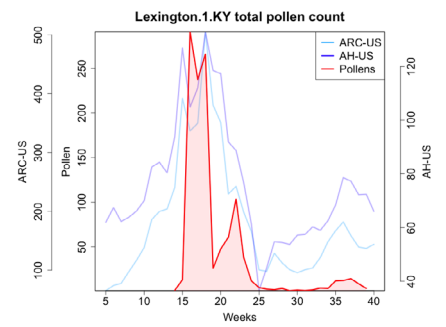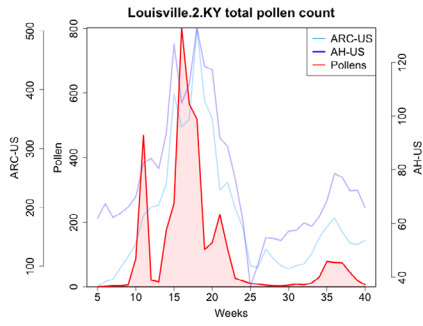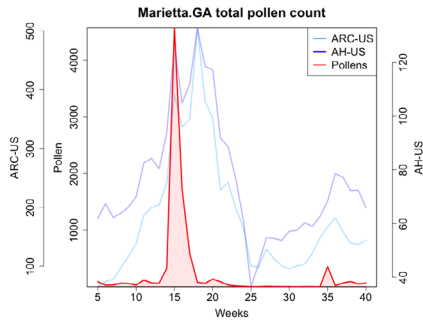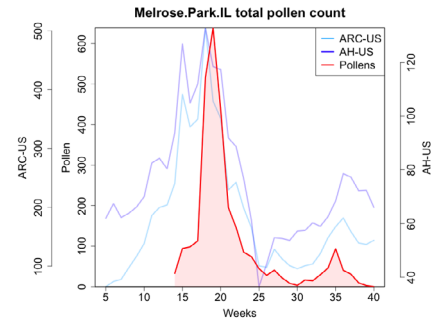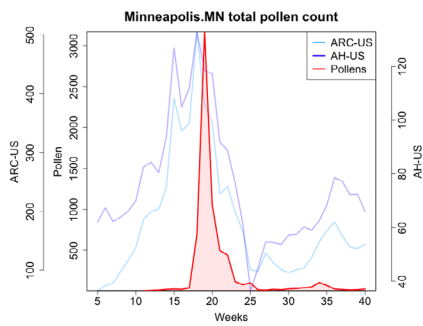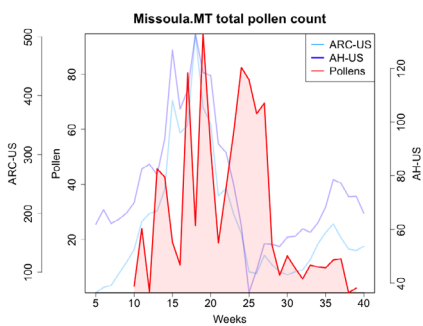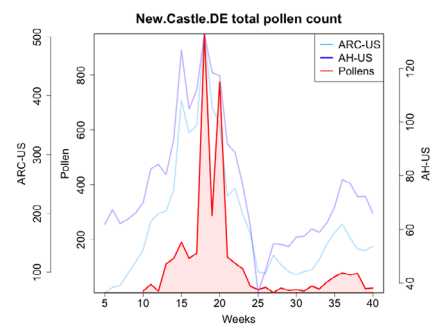

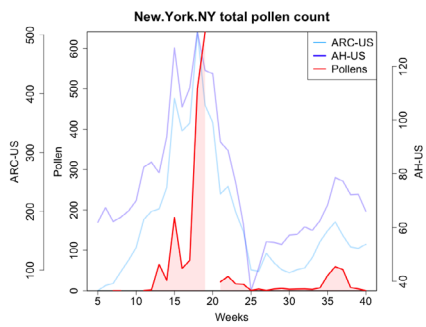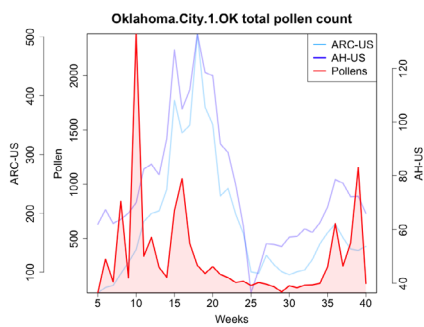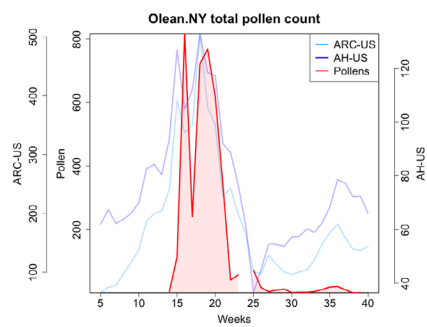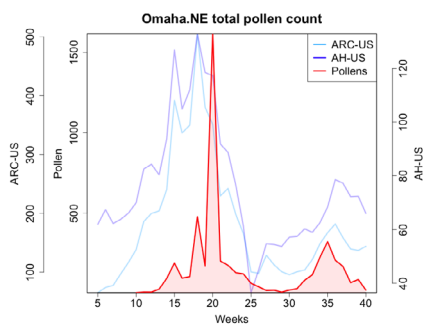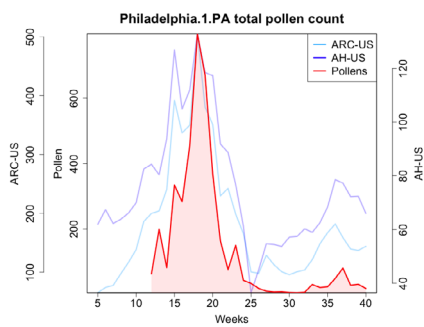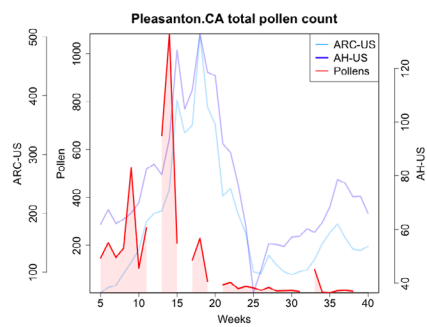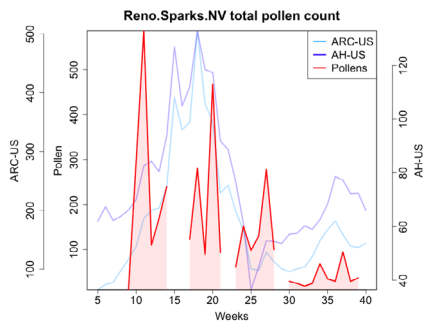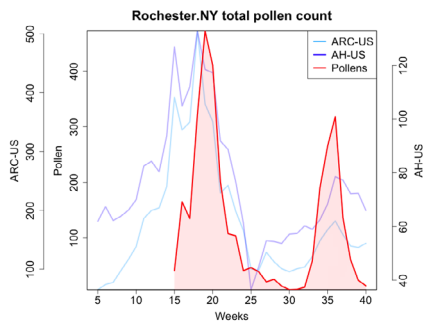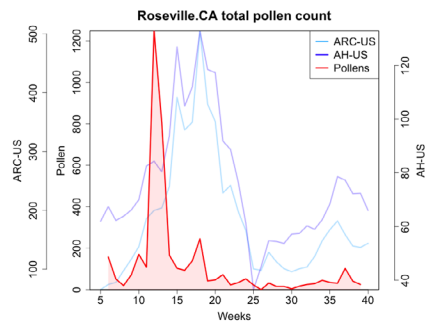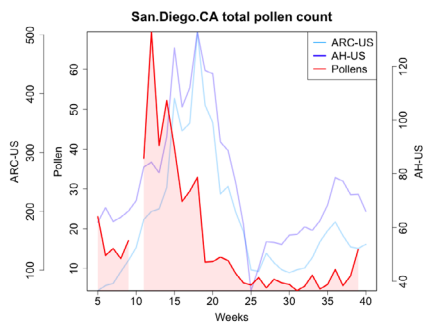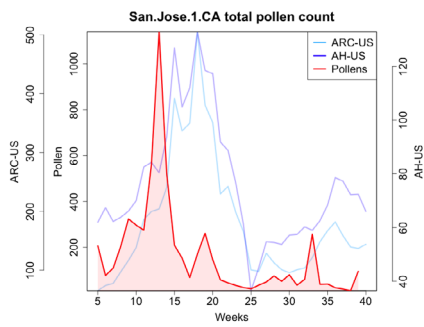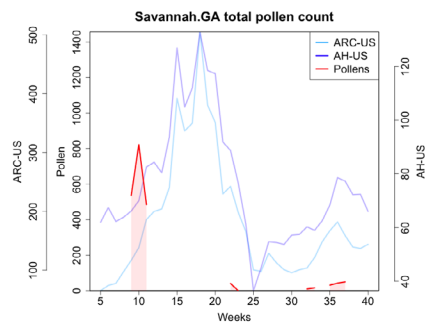

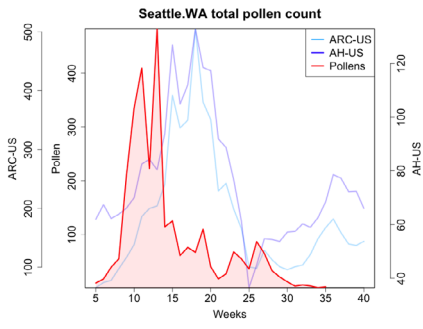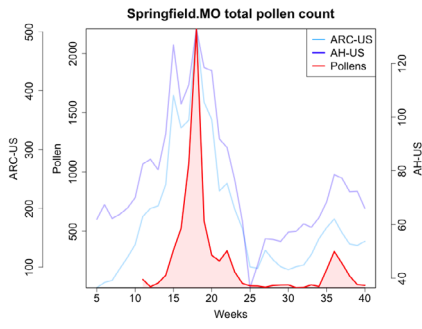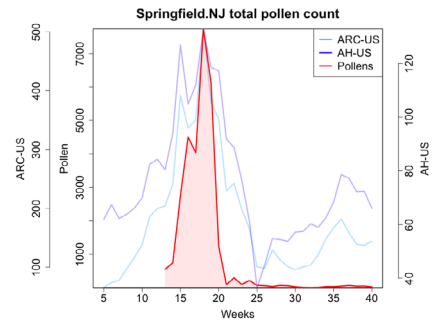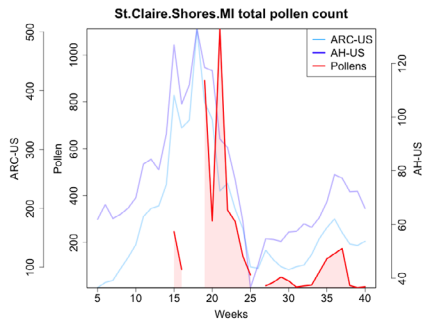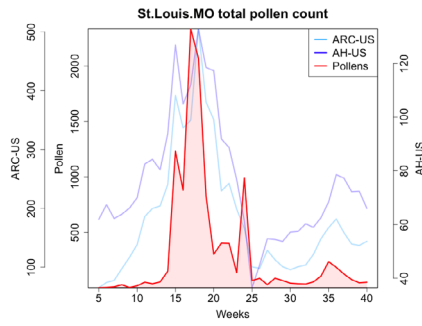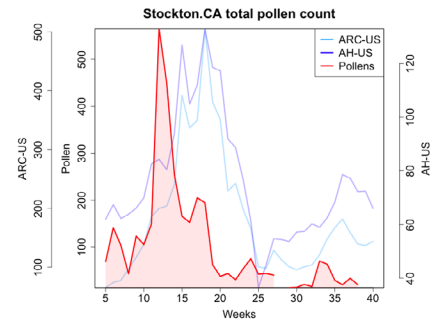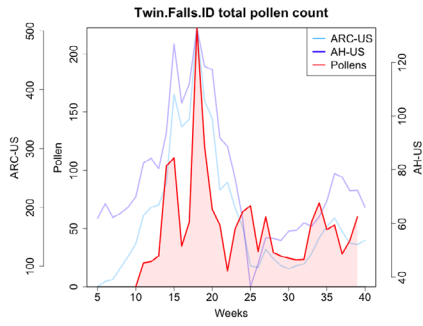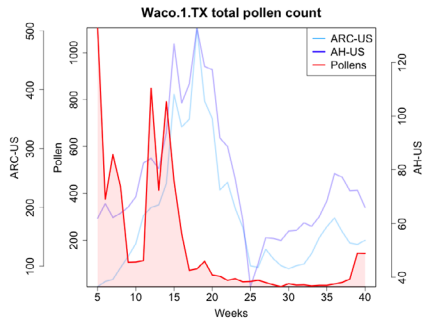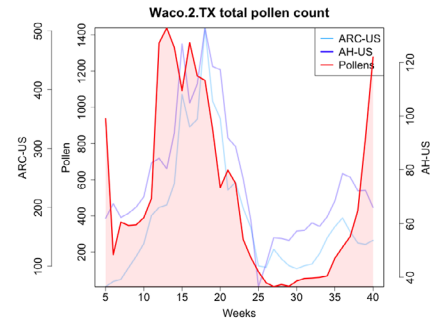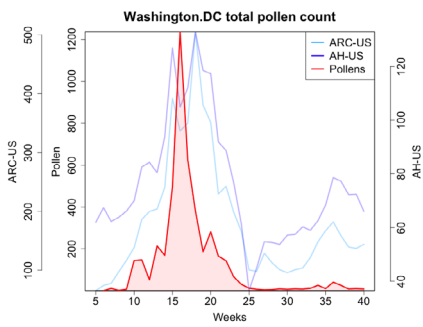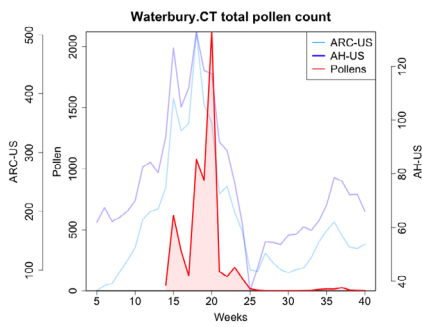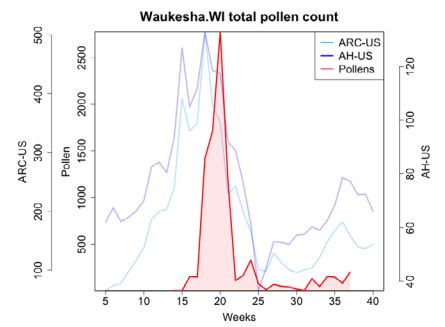

Supplement: pone.0133706.s006.pdf [file pone.0133706.s006.pdf]
