# Supplementary material for: Can Twitter Be a Source of Information on Allergy? Correlation of Pollen Counts with Tweets Reporting Symptoms of Allergic Rhinoconjunctivitis and Names of Antihistamine Drugs
Source: PubMed Central journal article supplement (PMC4510127; doi:10.1371/journal.pone.0133706), 2015-07-21
Supplement: pone.0133706.s003.pdf [file pone.0133706.s003.pdf]

**NAB Station Data Attribution List**  
**"Syndromic surveillance of allergy through social media"**  
**Alberto E. Tozzi, MD**  
**Bambino Gesù Ospedale Pediatrico**

Guy Robinson, PhD  
The Louis Calder Center  
Armonk, NY

David Cypcar, MD FAAAAI  
Allergy Partners of Western North Carolina  
Asheville, NC

Jonathon Matz, MD FAAAAI &  
David Golden, MD FAAAAI  
Dr. Golden and Dr. Matz, LLC  
Baltimore, MD

Linda B. Ford, MD FAAAAI  
The Asthma and Allergy Center, PC  
Bellevue (Omaha), NE

John T. Klimas, MD FAAAAI  
Carolina Asthma and Allergy Center  
Charlotte, NC

David R. Weldon, MD FAAAAI, FACAAI  
Scott & White Clinic  
College Station, TX

Robert A. Nathan, MD FAAAAI &  
Daniel F. Soteres, MD MPH FAAAAI  
Asthma & Allergy Associates, PC  
Colorado Springs (Station 1), CO

William Storms, MD FAAAAI  
The William Storms Allergy Clinic  
Colorado Springs (Station 2), CO

Andy Roth  
RAPCA  
Dayton, OH

Philip E. Gallagher, MD FAAAAI  
Allergy & Asthma Associates of Northeastern  
PA  
Erie, PA

Kraig W. Jacobson, MD FAAAAI  
Allergy & Asthma Research Group  
Eugene, OR

Marie H Fitzgerald, MD  
North Texas Pollen Station  
Flower Mound, TX

Neil L Kao MD FAAAAI  
Allergic Disease and Asthma Center  
Greenville, SC

Jay Portnoy, MD FAAAAI  
Children's Mercy Hospital  
Kansas City, MO

Michael Miller, MD FAAAAI  
Allergy, Asthma and Immunology  
Knoxville (Station 1), TN

Beth Miller, MD  
University of Kentucky Asthma Allergy &  
Immunology  
Lexington (Station 1), KY

James L. Sublett, MD  
FAAAAAI Family Allergy & Asthma  
Louisville (Station No 2), KY

Stanley M. Fineman, MD FAAAAI  
Atlanta Allergy and Asthma Clinic  
Marietta, GA

Joseph G. Leija, MD FAAAAI  
Dr. Joseph Leija  
Melrose Park, IL

Harold B. Kaiser, MD FAAAAI  
Clinical Research Institute  
Minneapolis, MN

**NAB Station Data Attribution List**  
**"Syndromic surveillance of allergy through social media"**  
**Alberto E. Tozzi, MD**  
**Bambino Gesù Ospedale Pediatrico**

Emily Weiler  
U of Montana, Ctr for Environmental Health  
Sciences  
Missoula, MT

Michael McDowell  
Division of Air Quality, DNREC, State of  
Delaware  
New Castle, DE

Guy Robinson, PhD  
Fordham College at Lincoln Center  
New York, NY

Warren V. Filley, MD FAAAAI  
OK Allergy Asthma Clinic, Inc.  
Oklahoma City (Station No 1), OK

Fred Lewis, MD FAAAAI  
Fred Lewis, MD FAAAAI  
Olean, NY

David Morris, MD  
Allergy Associates of LaCrosse  
Onalaska, WI

Donald J. Dvorin, MD FAAAAI  
Allergic Disease Associates, P.C.  
Philadelphia (Station No 1), PA

Allyson Tevirzian, MD  
Allergy Medical Group of the Bay Area  
Pleasanton, CA

Donald W. Pulver, MD FAAAAI  
Allergy, Asthma & Immunology of Rochester  
Rochester, NY

Sunil P. Perera, MD FAAAAI  
Allergy Medical Group of the North Area  
Sacramento, (Roseville) CA

Robert T. Reid, MD  
Erik and Ese Banck Clinical Research Center  
San Diego (Station 1), CA

Robert T. Reid, MD  
Robert T. Reid, MD FAAAAI  
San Diego (Station 2), CA

Theodore Chu, MD FAAAAI  
Theodore Chu, MD FAAAAI  
San Jose (Station No 1), CA

Alan Goldsobel, MD FAAAAI &  
James Wolfe, MD FAAAAI  
Allergy and Asthma Associates of No.  
California  
San Jose (Station No 2), CA

Benjamin Bolanos, PhD  
Medical Sciences Campus, UPR  
San Juan, PR

Brad H. Goodman, MD &  
Bruce D. Finkel, MD  
Coastal Allergy & Asthma, P.C.  
Savannah, GA

Frank Virant, MD FAAAAI  
Northwest Asthma & Allergy Center  
Seattle, WA

Leonard Shapiro, MD FAAAAI  
Allergy & Asthma Associates  
Sparks, NY

Rhizza Adams  
Springfield -Greene County Health Department  
Springfield, MO

Leonard Bielory, MD FAAAAI  
STARx Allergy & Asthma Center  
Springfield, NJ

**NAB Station Data Attribution List**  
**"Syndromic surveillance of allergy through social media"**  
**Alberto E. Tozzi, MD**  
**Bambino Gesù Ospedale Pediatrico**

Andrew I. Dzul, MD  
Lakeshore Ear Nose & Throat Center  
St. Clair Shores, MI

Wayne Wilhelm  
St. Louis County Health Department  
St. Louis, MO

Gregory W. Bensch, MD FAAAAI &  
George W Bensch, MD FAAAAI  
Allergy, Immunology and Asthma Medical  
Group  
Stockton, CA

Richard Henry, MD  
Asthma & Allergy of Idaho  
Twin Falls, ID

N.J. Amar, MD FAAAAI  
Allergy and Asthma Center  
Waco (Station No 1), TX

Pramila K. Daftary, MD FAAAAI  
Allergy & Asthma Care of Waco  
Waco (Station No 2), TX

Susan E. Kosisky MA  
Walter Reed Army Medical Ctr.  
Washington, DC

Christopher Randolph, MD  
Waterbury, CT

Walter Brummund, MD, PhD, FAAAAI  
Allergy & Asthma Centers, S.C.  
Waukesha, WI
